# Supplementary material for: Low cost aluminium foil platforms for rapid mass spectrometric differentiation of the fungal pathogen Aspergillus niger mycelium and spores by in situ gold nanosphere accelerated microwave digestion
Source: Royal Society of Chemistry journal article supplement (doi:10.1039/c3ra46788k), 2014-01-01
Supplement: c3ra46788k1.pdf [file c3ra46788k1.pdf]

1 Fig. S1

2

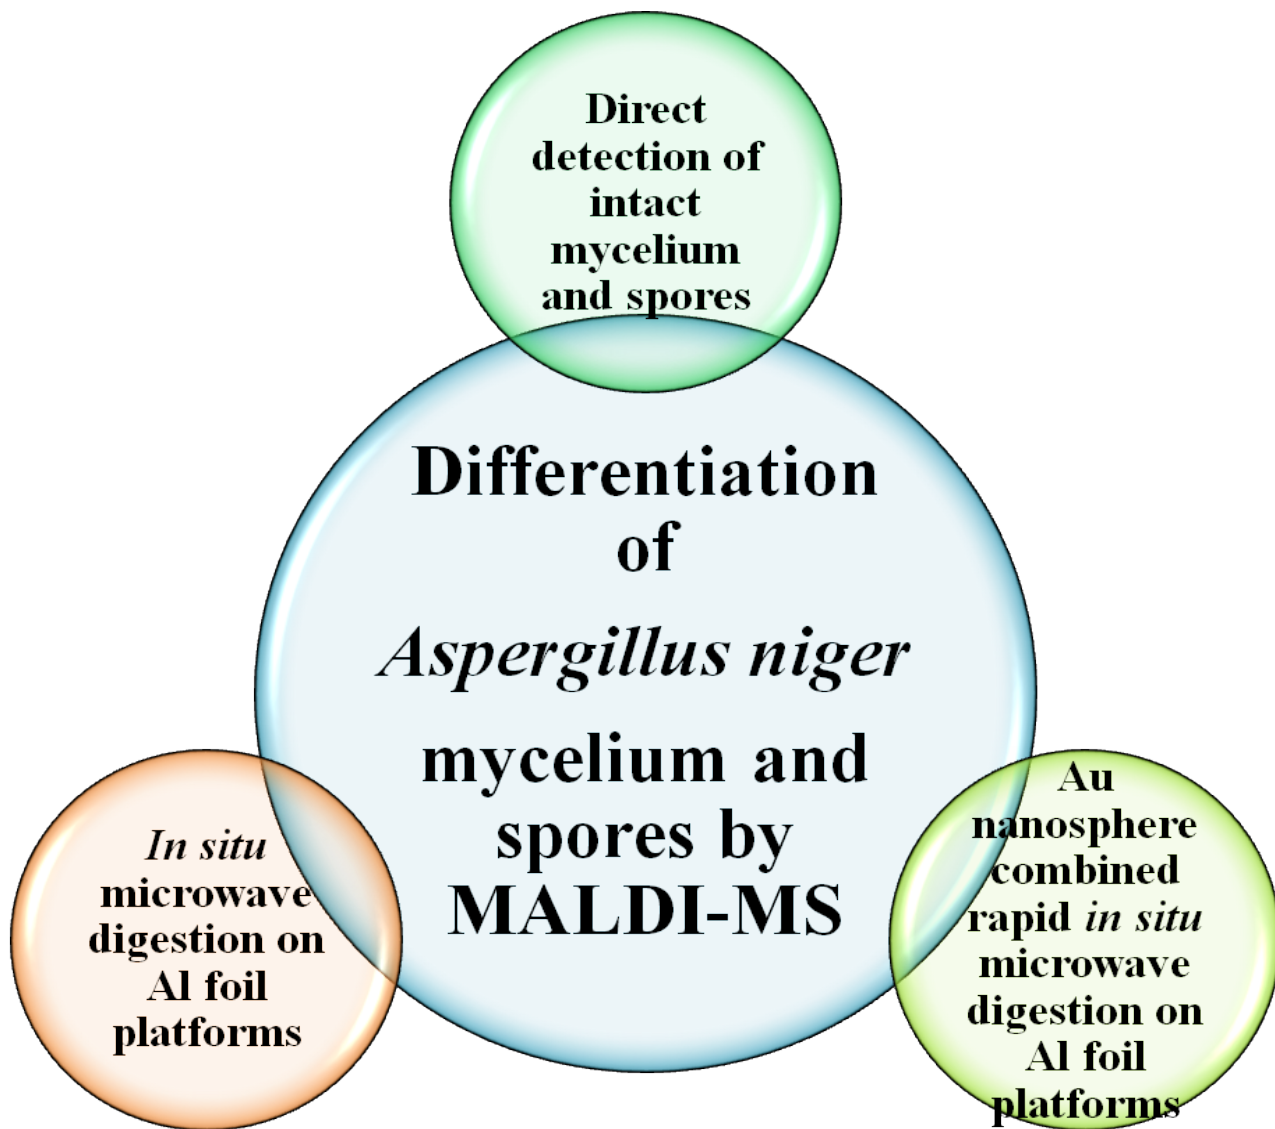

3

4

5

6

7

8

9 Fig. S2

10

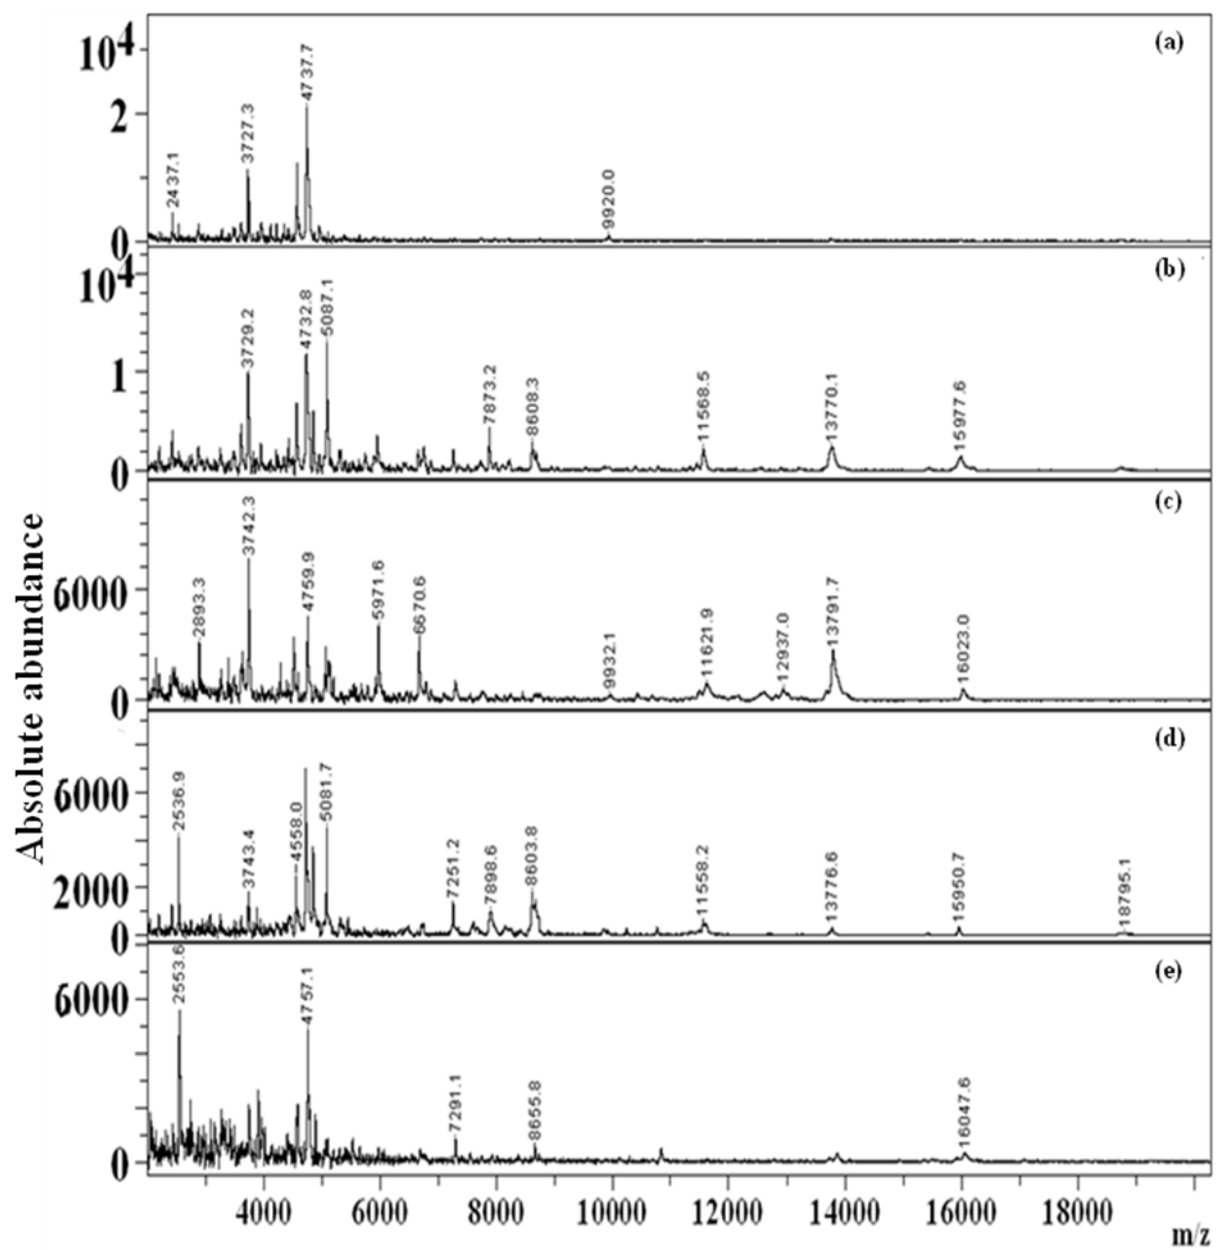

32

33

34 **Fig S3**

35

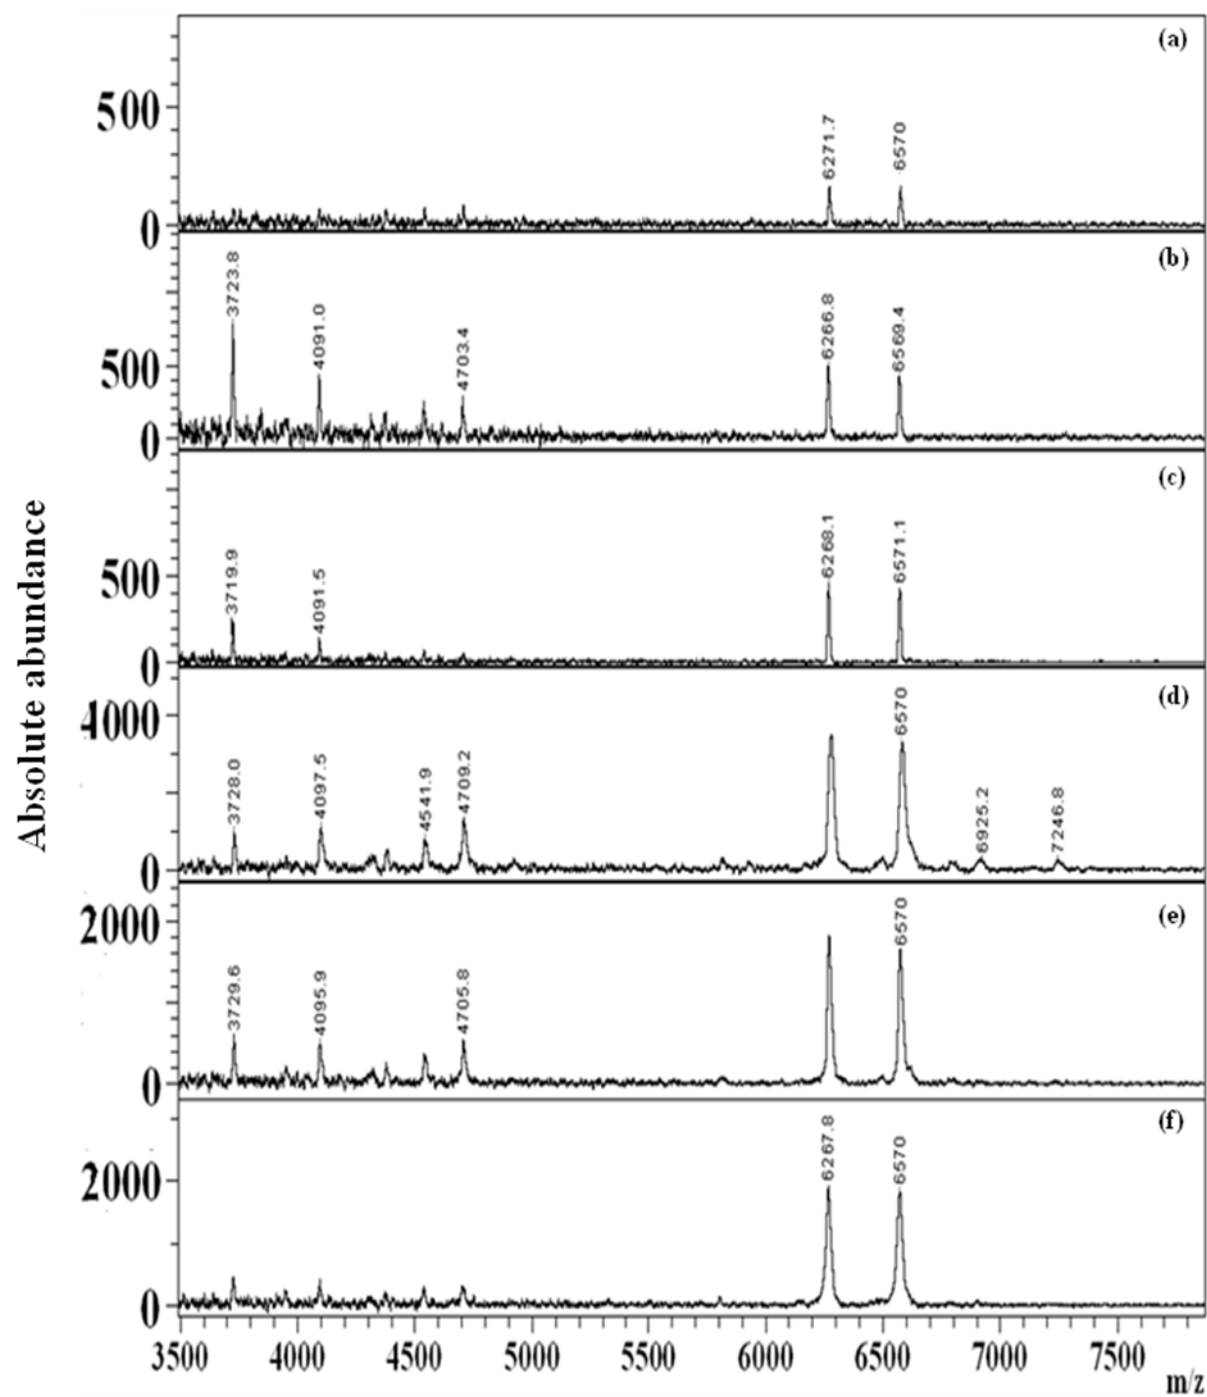

5

5

5

5

56

57

58 **Fig S4**

59

60

61

62

63

64

65

66

67

68

69

70

71

72

73

74

75

76

77

78

79

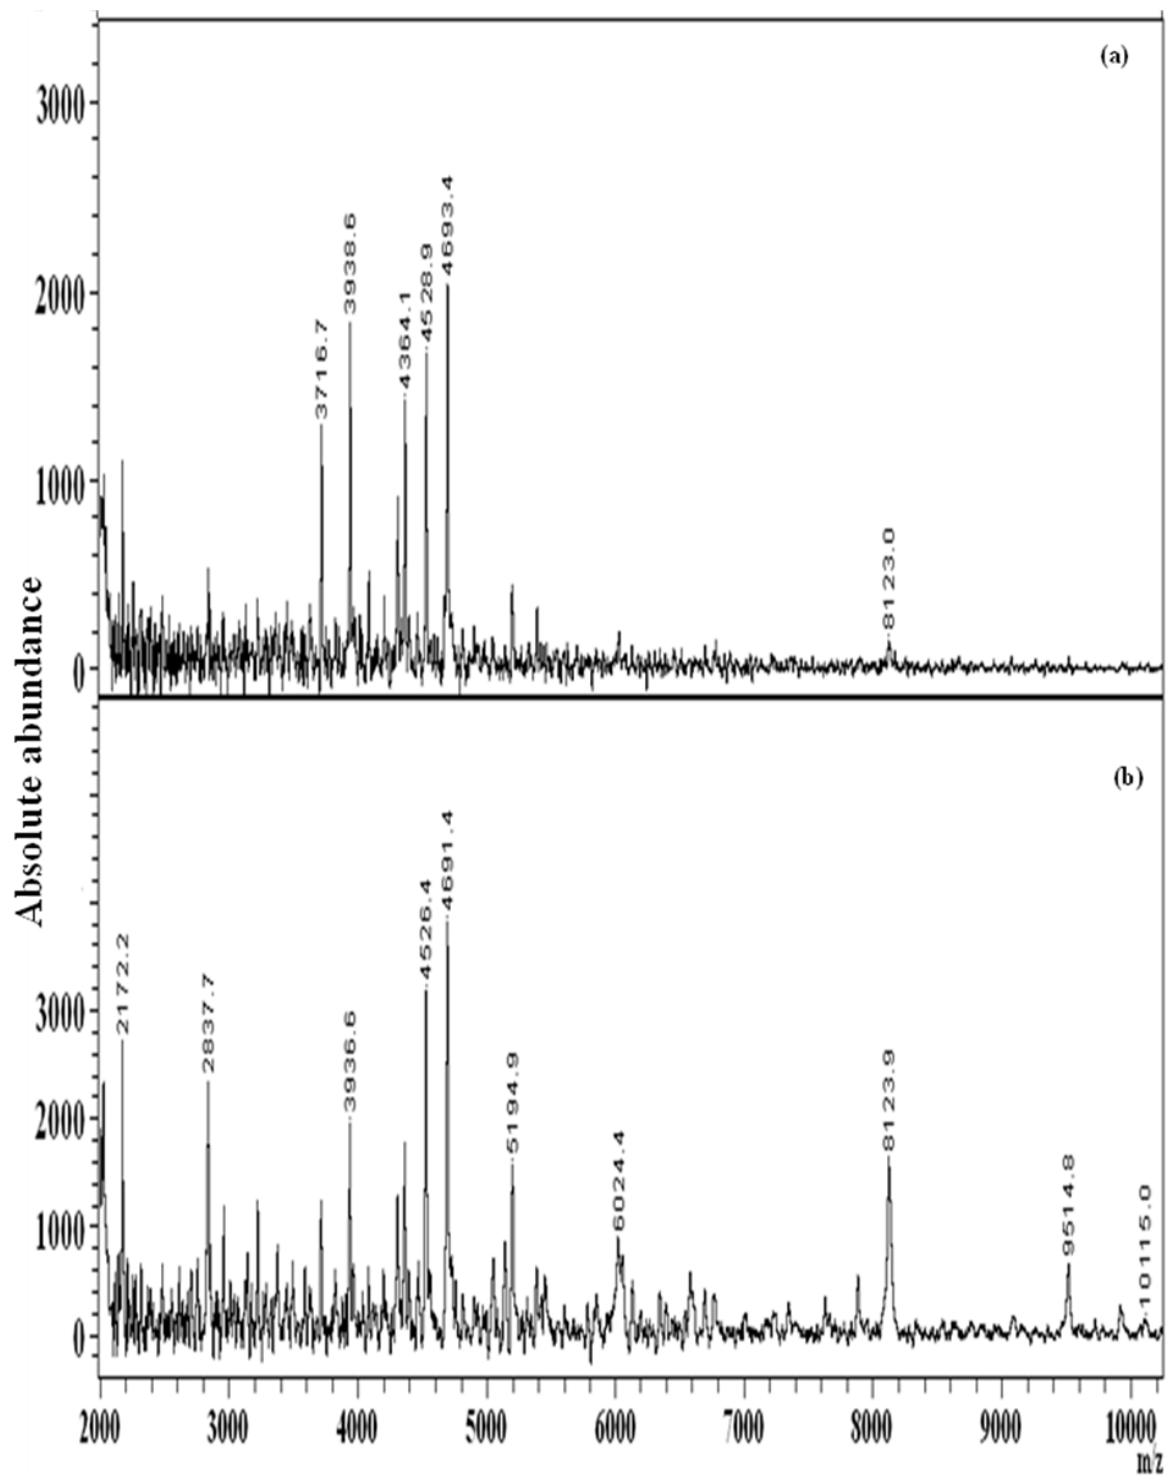

80

81 Fig S5

### Al foil enabled microwave digestion

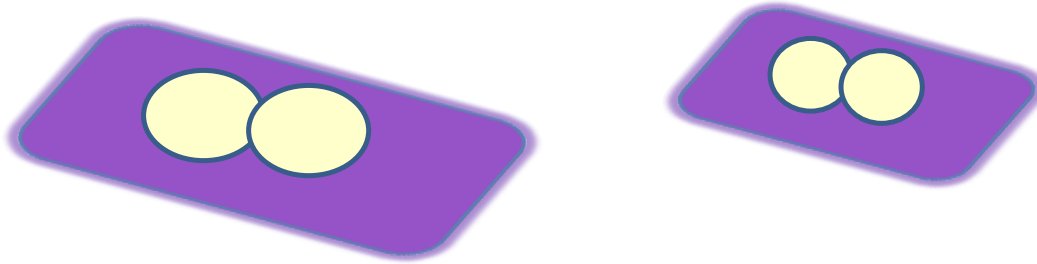

82

### Au nanosphere accelerated Al foil enabled microwave digestion- the sandwich heating effect

83

84

85

86

87

88

89

90

91

92

93

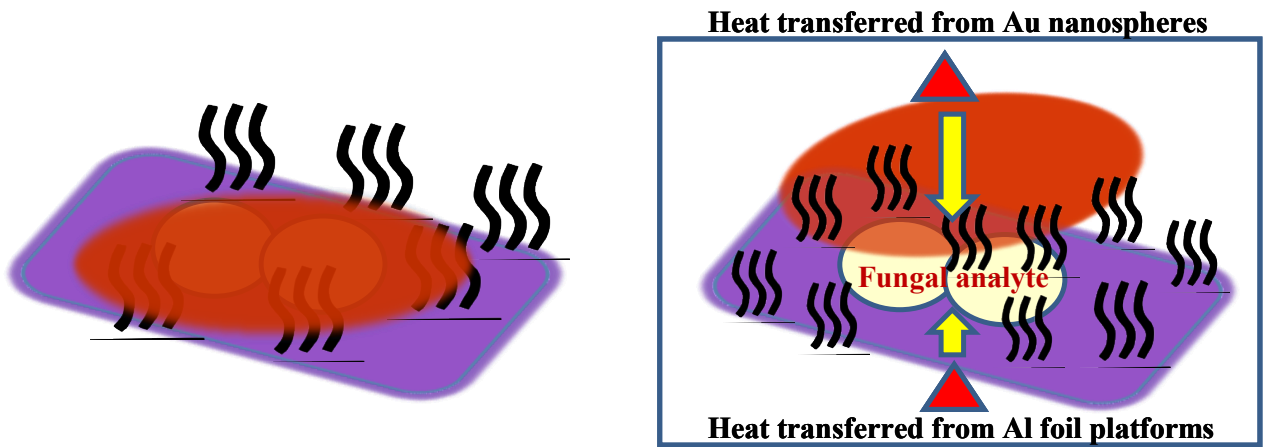

94

95

96

97 **Table S1. Optimizing the Al foil platforms sizes to prevent arcing during microwave**  
98 **digestion**

99

| <b>Al foil size</b> | <b>Sparking/Arcing in Microwave (3min)</b> |
|---------------------|--------------------------------------------|
| 10 x10 mm           | No                                         |
| 20 x 20 mm          | Yes ( in 1 min)                            |
| 30 x 30 mm          | Yes (<1 min)                               |
| 50 x 50 mm          | Yes (5 sec)                                |

100

101

102
